# Supplementary material for: Reorganization energy and Stokes shift calculations from spectral data as new efficient approaches in distinguishing the end point of micellization/aggregation
Source: Royal Society of Chemistry journal article supplement (doi:10.1039/c5ay02982a), 2016-01-01
Supplement: c5ay02982a1.pdf [file c5ay02982a1.pdf]

## **Supporting Information**

### **Reorganization Energy and Stokes Shift Calculations from Spectral Data as New Efficient Approaches in Distinguishing the End Point of Micellization/Aggregation**

Mintu Halder\*, Shubhashis Datta, Priyanka Bolel<sup>a</sup>, Niharendu Mahapatra, Sudipta Panja, Harsh Vardhan, Saurav Kayal, Deb Kumar Khatua, Ishita Das

Department of Chemistry, Indian Institute of Technology Kharagpur

Kharagpur-721302, India

<sup>a</sup> Current address: Amity School of Applied Sciences, Amity University, Gurgaon, Haryana-122 413, India

\*Corresponding author: [mintu@chem.iitkgp.ernet.in](mailto:mintu@chem.iitkgp.ernet.in)

Phone: +91-3222-283314, FAX: +91-3222-282252

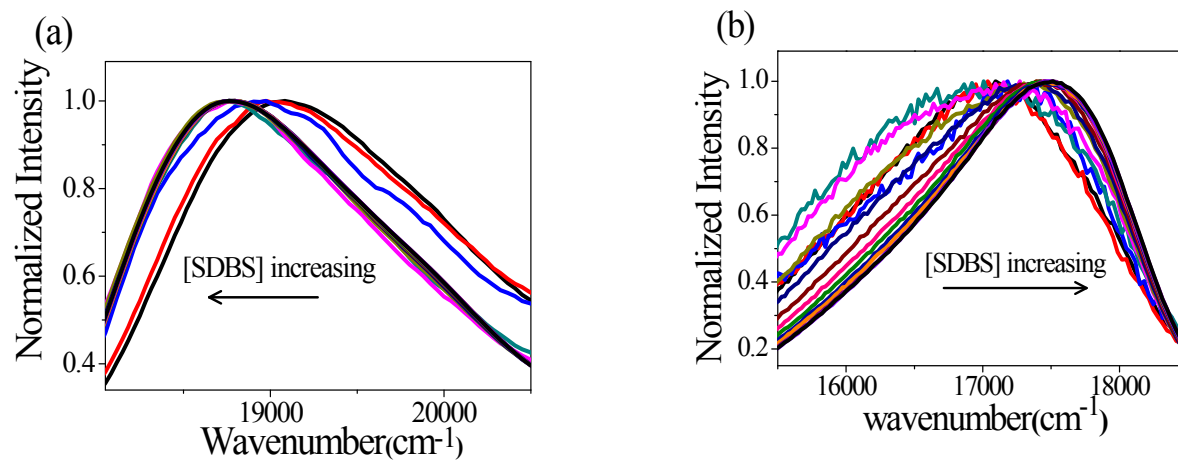

**Figure S1:** Normalized (a) excitation Spectra and (b) emission Spectral lineshapes of Safranin O against wavenumber at different concentration of SDBS. Concentrations of SDBS are varied from 0 to 3.2mM.
